# Supplementary material for: Silk fibroin scaffolds loaded with growth factors can reverse liver fibrosis
Source: Royal Society of Chemistry journal article supplement (doi:10.1039/d5bm01314c), 2026-01-01

## Supporting Information

### Silk Fibroin Scaffolds Loaded with Growth Factors Can Reverse Liver Fibrosis

Jingyi Wang, Zhanbo Wang, Shuo Zhao, Daxu Zhang, Jingjing Hu, Weilong Li, Xiaonan Shi, Shujun Ye, Xiaojiao Liu, Yaopeng Zhang\*, Li Yan\*

**Table S1. European Histological Scoring System for Fatty Liver Progression**

#### Blockade (FLIP - SAF)

| Evaluation Items          | Specific Conditions                                                         | Score |
|---------------------------|-----------------------------------------------------------------------------|-------|
| Steatosis (S)             | Steatosis range < 5%                                                        | 0     |
|                           | Steatosis range 5 - 33%                                                     | 1     |
|                           | Steatosis range 33 - 66%                                                    | 2     |
|                           | Steatosis range > 66%                                                       | 3     |
| Inflammatory Activity (A) | No lobular inflammation (200× magnification)                                | 0     |
|                           | ≤2 foci of aggregation in lobular inflammation (200× magnification)         | 1     |
|                           | >2 foci of aggregation in lobular inflammation (200× magnification)         | 2     |
|                           | Balliocytois: Hepatocytes are cubic, normal - sized, with pink eosinophilic | 0     |

|              |                                                                                                                                    |   |
|--------------|------------------------------------------------------------------------------------------------------------------------------------|---|
|              | cytoplasm                                                                                                                          |   |
|              | Balliocytes: Hepatocytes are round, with pale, reticular cytoplasm, distributed in clusters, similar in size to normal hepatocytes | 1 |
|              | Balliocytes: At least 2 - fold larger in volume compared to grade 1 hepatocytes                                                    | 2 |
| Fibrosis (F) | No fibrosis                                                                                                                        | 0 |
|              | Mild perisinusoidal fibrosis                                                                                                       | 1 |
|              | Moderate perisinusoidal fibrosis                                                                                                   | 1 |
|              | Only portal - area fibrosis                                                                                                        | 1 |
|              | Perisinusoidal and portal - area fibrosis                                                                                          | 2 |
|              | Bridging fibrosis                                                                                                                  | 3 |
|              | Liver cirrhosis                                                                                                                    | 4 |

**Table S2: Primer sequences used for real-time PCR**

| Primer       | 3'-forward           | 5'-reverse              |
|--------------|----------------------|-------------------------|
| <i>TRAF2</i> | GCCCTGAGTAACAAGGTGCA | TCGCCATTCAAGTAGACTCGTAG |

|            |                       |                         |
|------------|-----------------------|-------------------------|
| <i>Bax</i> | TCATCCAGGATCGAGCAGG   | CAAAGTAGAAGAGGGCAACCAC  |
| <i>FXR</i> | TGGGCTCCGAATCCTCTTAGA | TGGTCCTCAAATAAGATCCTTGG |
| <i>OAT</i> | ACGGCGGAAACCCACTAG    | CTCGAAGTCGCAGGCACA      |

**Table S3. The expression levels of IL-6 and TNF- $\alpha$  in mice serum quantified by ELSA assays**

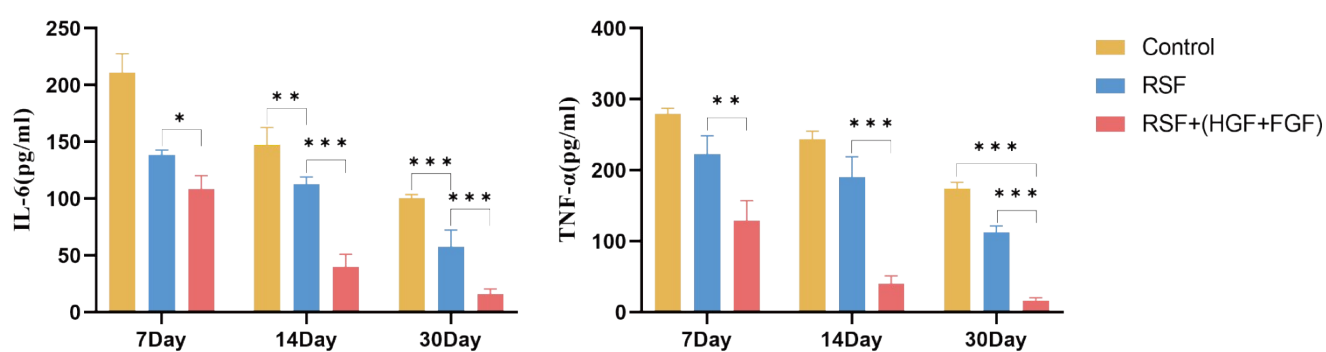

Supplement: d5bm01314c1.pdf [file d5bm01314c1.pdf]
